# Supplementary figures and images for: Getrennt order zusammen?: ein schwieriges rechtschreibkapitel im deutschen und spanischen
Source: Royal Society of Chemistry journal article supplement (doi:10.1039/d0sm01815e), 2008-01-01

“face up”  
{100}

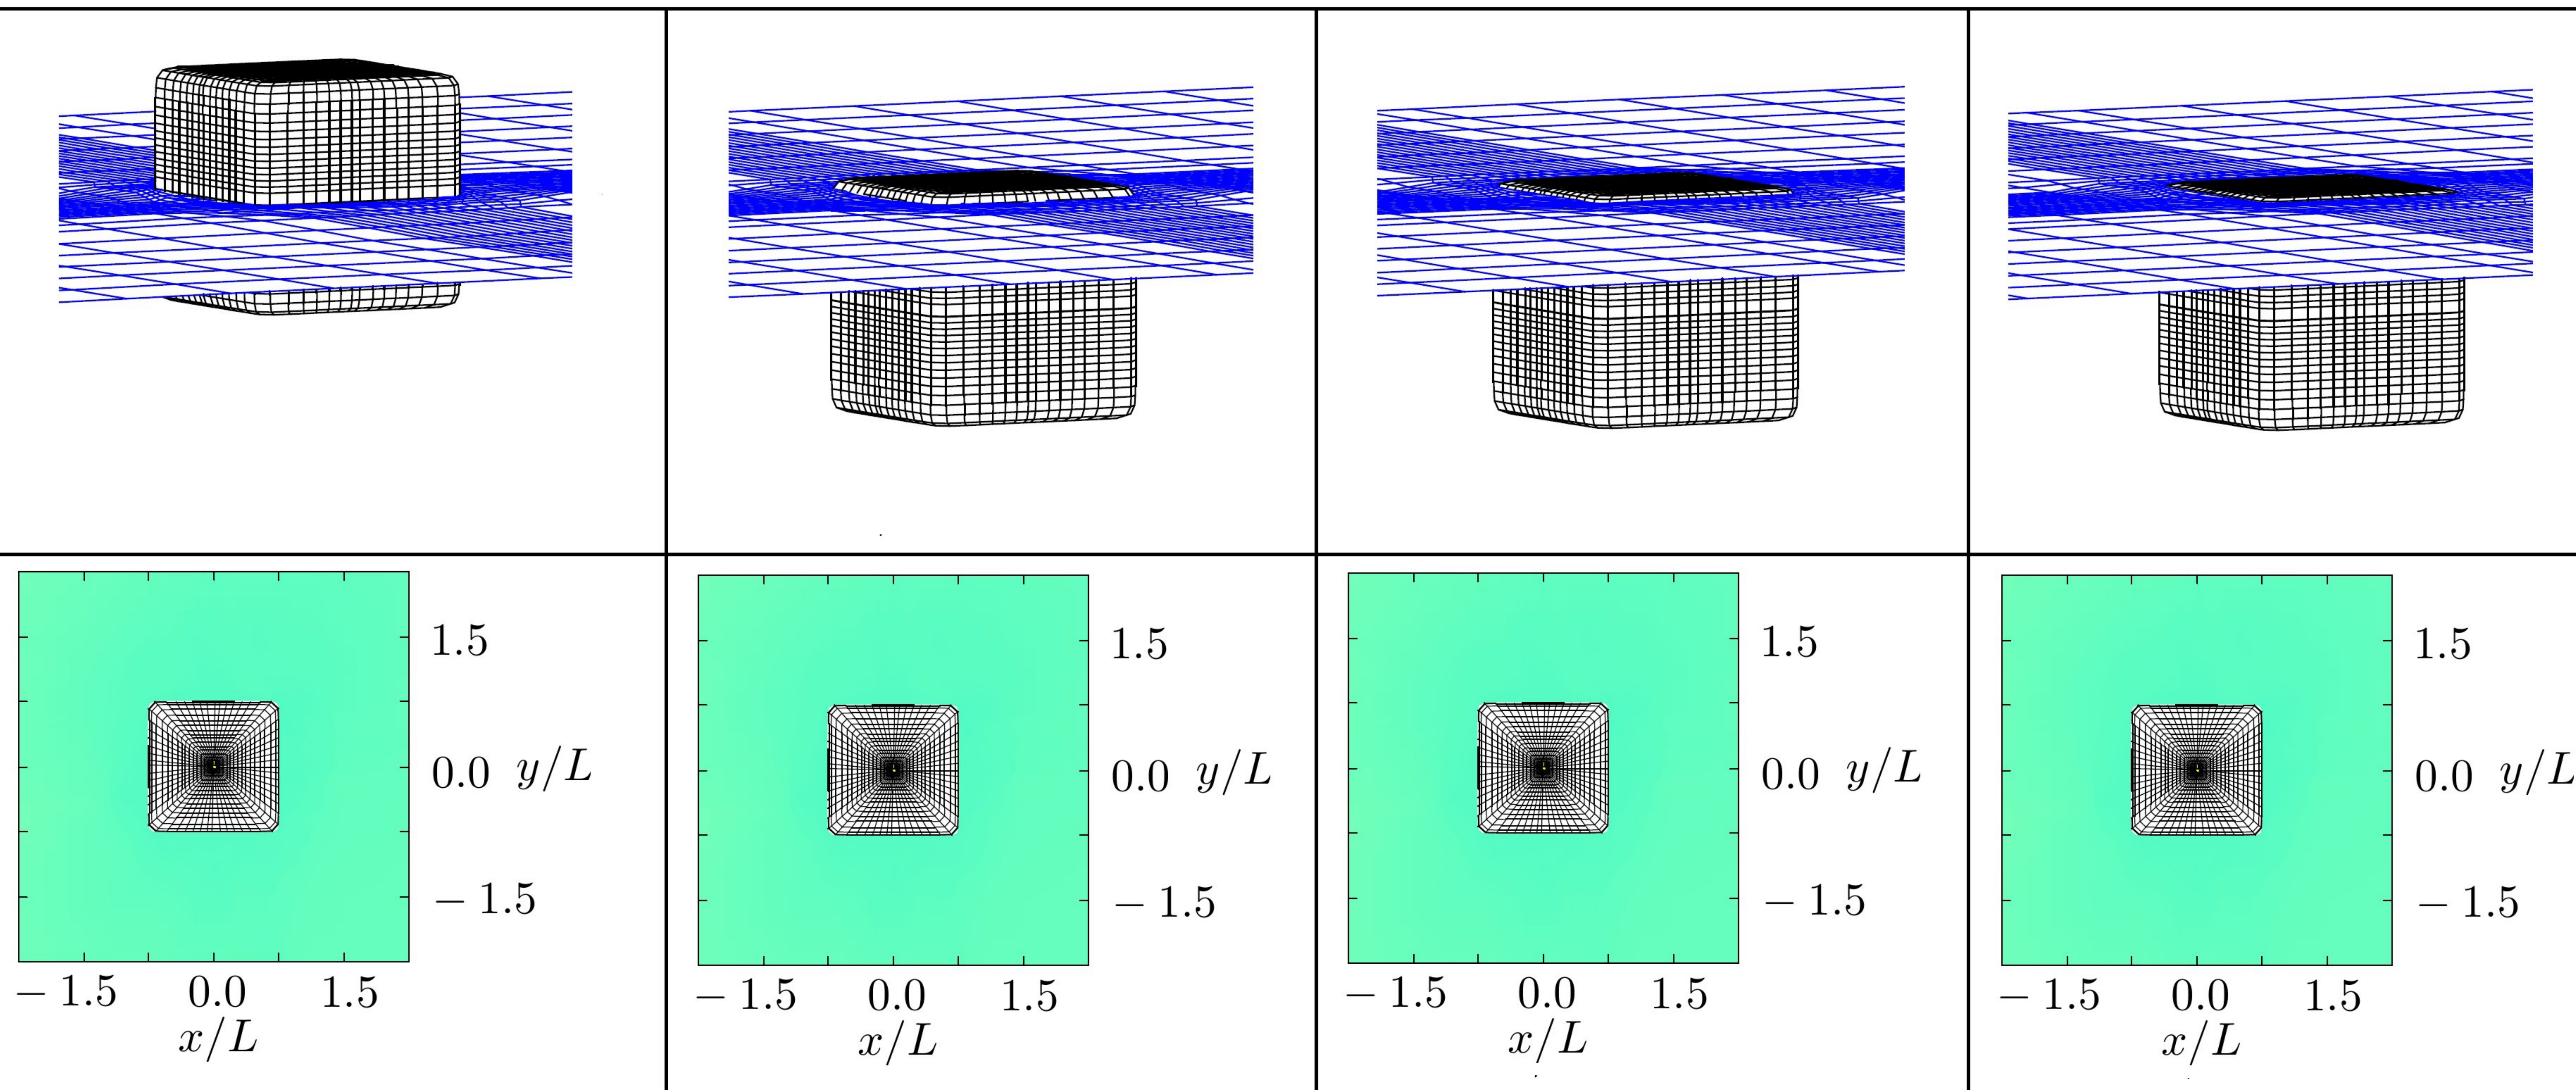

$$\cos \theta = 0.0$$

$$\cos \theta = 0.2$$

$$\cos \theta = 0.4$$

$$\cos \theta = 0.6$$

Supplement: d0sm01815e1.pdf [file d0sm01815e1.pdf]

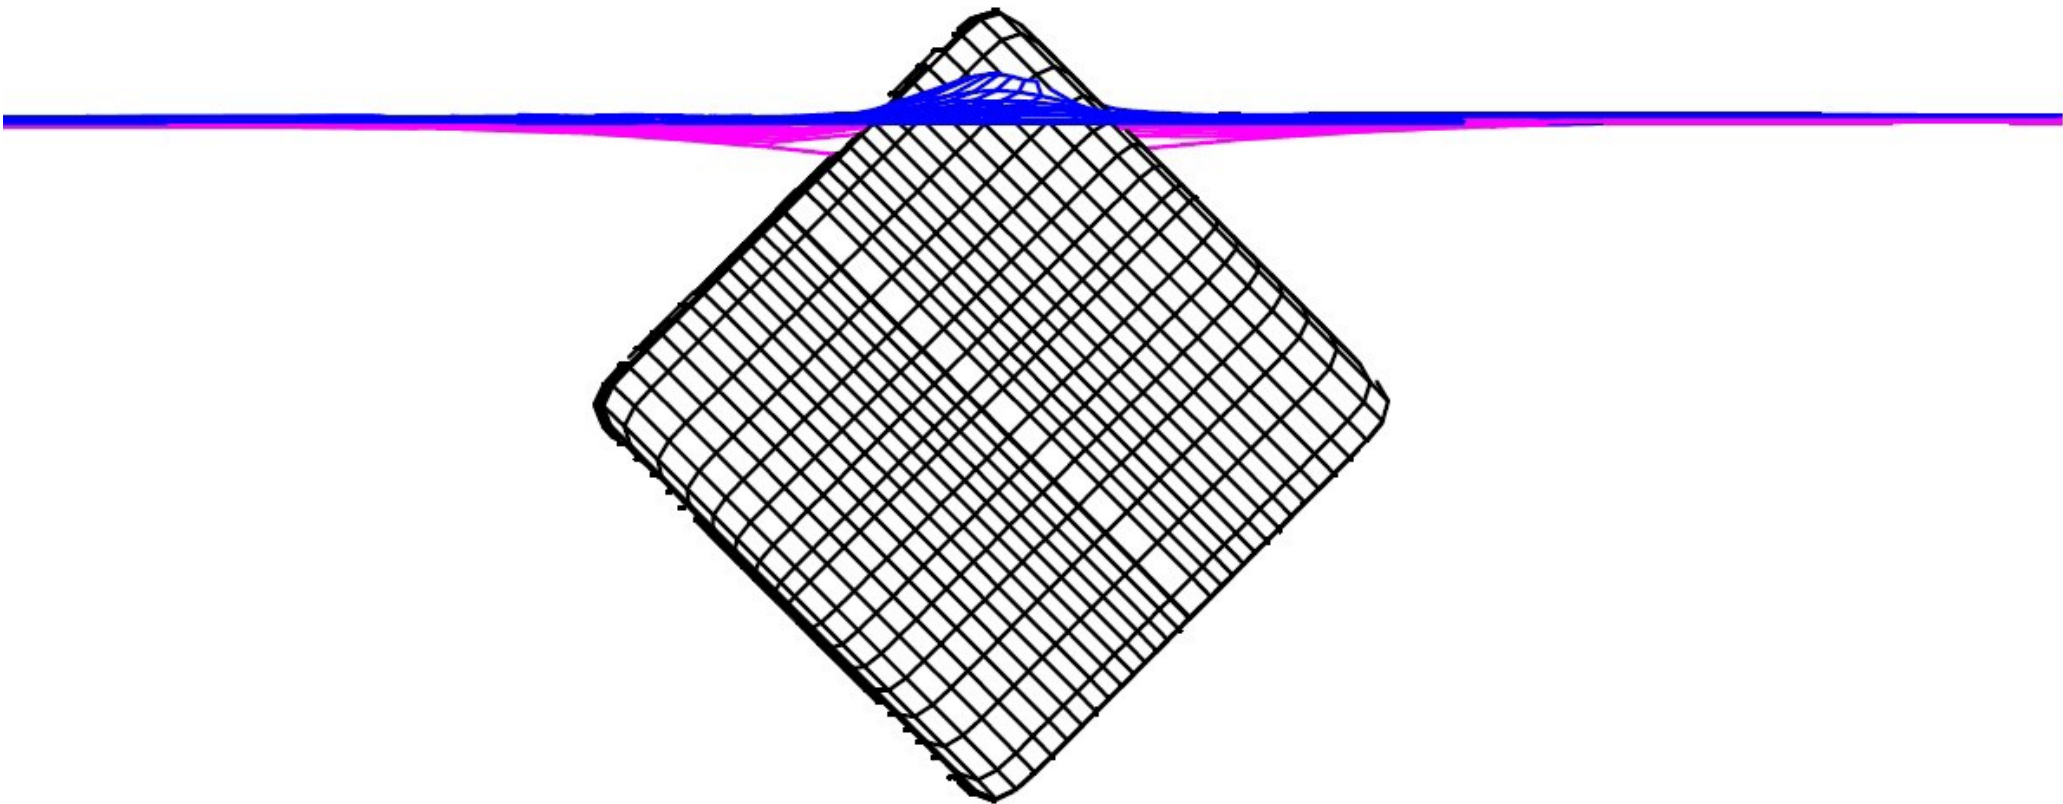

Supplement: d0sm01815e2.pdf [file d0sm01815e2.pdf]
